# Supplementary material
Source: publisher figshare collection journal article supplement (https://acs.figshare.com/ndownloader/files/4285150)
Supplement: Supplementary file 1 [file 4285150]

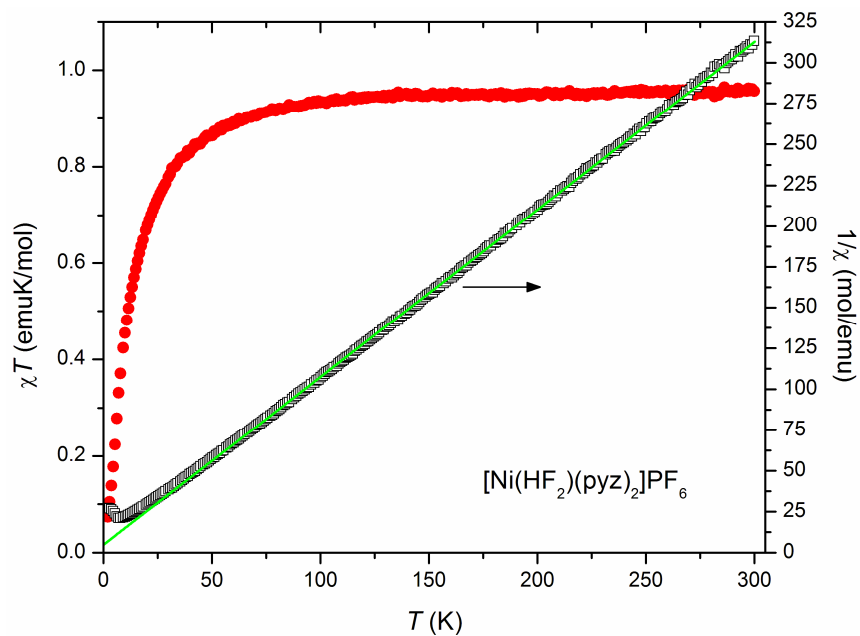

**Figure S1.**  $\chi T$  vs.  $T$  and  $1/\chi$  vs  $T$  plots for  $[\text{Ni}(\text{HF}_2)(\text{pyz})_2]\text{PF}_6$  (**1**). The green line is a fit of the reciprocal magnetic susceptibility data to a Curie-Weiss law [ $g = 2.043(1)$  and  $\theta = -12.5(1)$  K].

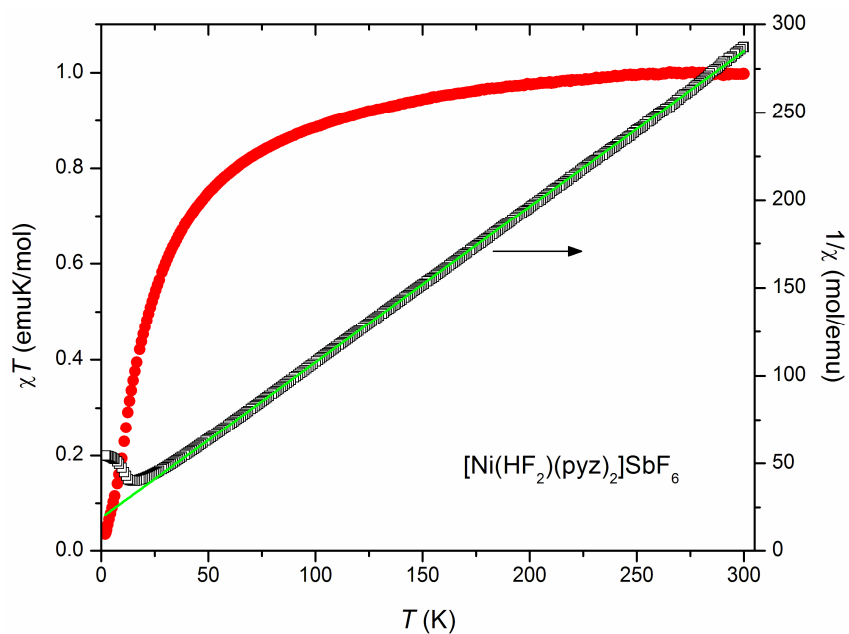

**Figure S2.**  $\chi T$  vs.  $T$  and  $1/\chi$  vs  $T$  plots for  $[\text{Ni}(\text{HF}_2)(\text{pyz})_2]\text{SbF}_6$  (**2**). The green line is a fit of the reciprocal magnetic susceptibility data to a Curie-Weiss law [ $g = 2.081(1)$  and  $\theta = -21.42(2)$  K].

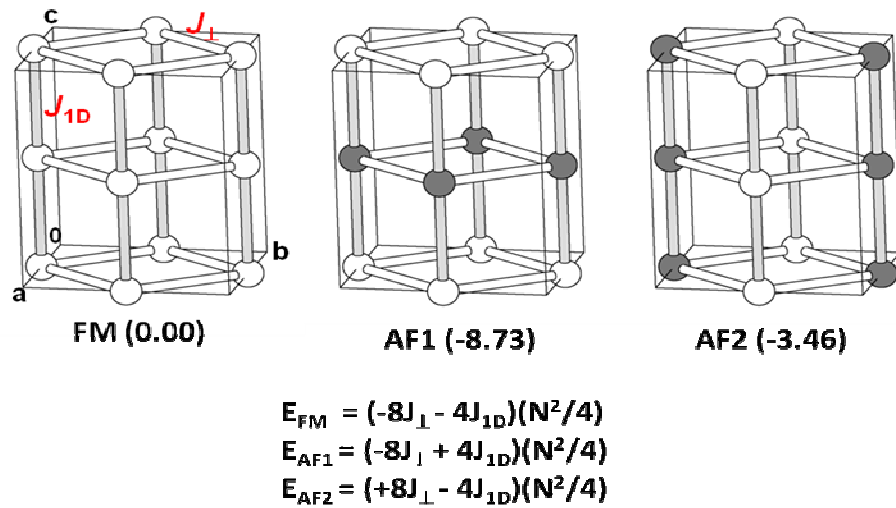

**Figure S3.** Three ordered spin states of  $[\text{Ni}(\text{HF}_2)(\text{pyz})_2]\text{PF}_6$  (**1**) used to extract the two spin exchanges  $J_{\perp}$  and  $J_{1\text{D}}$  considered, where the up-spin and down-spin  $\text{Ni}^{2+}$  sites are indicated by white and grey circles, respectively. The number in each parenthesis refers to the relative energies (in meV per 4 formula units) obtained from the GGA+U calculations with  $U = 4$  eV. The total spin exchange energies (per 4 formula units) of the three ordered spin states, expressed in terms of  $J_{\perp}$  and  $J_{1\text{D}}$ , are also given.

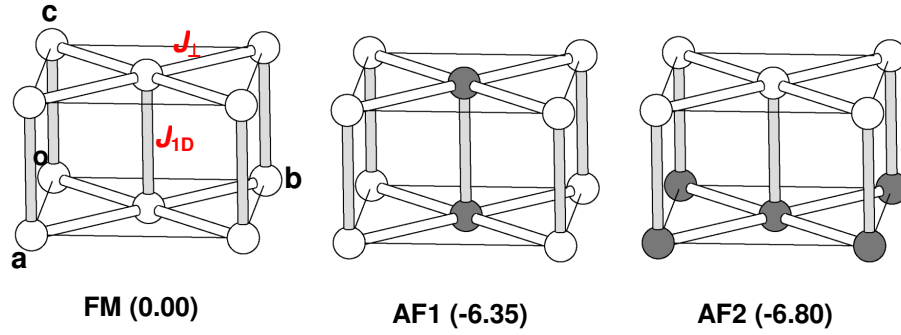

$$E_{\text{FM}} = (-4J_{\perp} - 2J_{1\text{D}})N^2/4$$

$$E_{\text{AF1}} = (+4J_{\perp} - 2J_{1\text{D}})N^2/4$$

$$E_{\text{AF2}} = (-4J_{\perp} + 2J_{1\text{D}})N^2/4$$

**Figure S4.** Three ordered spin states of  $[\text{Ni}(\text{HF}_2)(\text{pyz})_2]\text{SbF}_6$  (**2**) used to extract the two spin exchanges  $J_{\perp}$  and  $J_{1\text{D}}$  considered, where the up-spin and down-spin  $\text{Ni}^{2+}$  sites are indicated by white and grey circles, respectively. The number in each parenthesis refers to the relative energies (in meV per 2 formula units) obtained from the GGA+U calculations with  $U = 4$  eV. The total spin exchange energies (per 2 formula units) of the three ordered spin states, expressed in terms of  $J_{\perp}$  and  $J_{1\text{D}}$ , are also given.
